# Supplementary material for: Mouse mutant phenotyping at scale reveals novel genes controlling bone mineral density
Source: PLoS Genet. 2020 Dec 28;16(12):e1009190. doi: 10.1371/journal.pgen.1009190 (PMC7822523; doi:10.1371/journal.pgen.1009190)
Supplement: S5 Table — (XLSX) [file pgen.1009190.s006.xlsx]

## Sheet: BMD top MP terms count
Top MP term	Number of BMD phenotype genes with these top MP terms
MP:0005390 [skeleton phenotype]	201
MP:0005376 [homeostasis/metabolism phenotype]	99
MP:0005378 [growth/size/body region phenotype]	94
MP:0005386 [behavior/neurological phenotype]	92
MP:0005375 [adipose tissue phenotype]	72
MP:0005397 [hematopoietic system phenotype]	54
MP:0010768 [mortality/aging]	53
MP:0005387 [immune system phenotype]	44
MP:0005391 [vision/eye phenotype]	34
MP:0005385 [cardiovascular system phenotype]	33
MP:0005371 [limbs/digits/tail phenotype]	28
MP:0005389 [reproductive system phenotype]	28
MP:0003631 [nervous system phenotype]	20
MP:0010771 [integument phenotype]	18
MP:0005377 [hearing/vestibular/ear phenotype]	17
MP:0005367 [renal/urinary system phenotype]	11
MP:0005382 [craniofacial phenotype]	11
MP:0005380 [embryo phenotype]	9
MP:0005379 [endocrine/exocrine gland phenotype]	8
MP:0005388 [respiratory system phenotype]	8
MP:0005370 [liver/biliary system phenotype]	6
MP:0000001 [mammalian phenotype]	5
MP:0005381 [digestive/alimentary phenotype]	5
MP:0001186 [pigmentation phenotype]	3
MP:0005385 [muscle phenotype]	1
